# Supplementary material
Source: PubMed Central journal article supplement (PMC3321800)
Supplement: 10_193_Newrzela_Suppl.pdf [file 10_193_Newrzela_Suppl.pdf]

## Supplementary data, Newrzela et al., 2011

### Figure legends of supplementary figures

#### **Figure S1. Integration analysis for eGFP transduced and passaged primary murine T cells.**

Primary murine T cells were transduced with MP91-eGFP and passaged under normal cell culture conditions (100U/ml IL-2) for several weeks. LM-PCR analysis was performed 4, 11 and 84 days after transduction. Clones start to dominate the culture 11 days after transduction. A representative LM-PCR result is shown. M, Marker.

#### **Figure S2. Limited dilution of the immortalized T-cell population.**

After limited dilution integration-site specific PCR was performed on 14 established clones to determine clonality of the immortalized T-cell population. Integrations on chromosome 2, in close proximity to *IL2RA/IL15RA* (A) and chromosome 5, in close proximity to *Hod1* (B) were investigated. All clones presented the expected amplification fragments (106bp for *IL2RA/IL15RA*- and 227bp for *Hod1*-RIS). M=100bp DNA ladder.

#### **Figure S3. IL15RA expression on the protein level.**

IL15RA overexpression was verified by Western Blot. Compared to freshly isolated, non-stimulated T cells (2) IL15RA expression was increased in the immortalized population (3), but was not comparable to the intensive signal in stimulated T cells (1). Black arrow indicates IL15RA protein band.

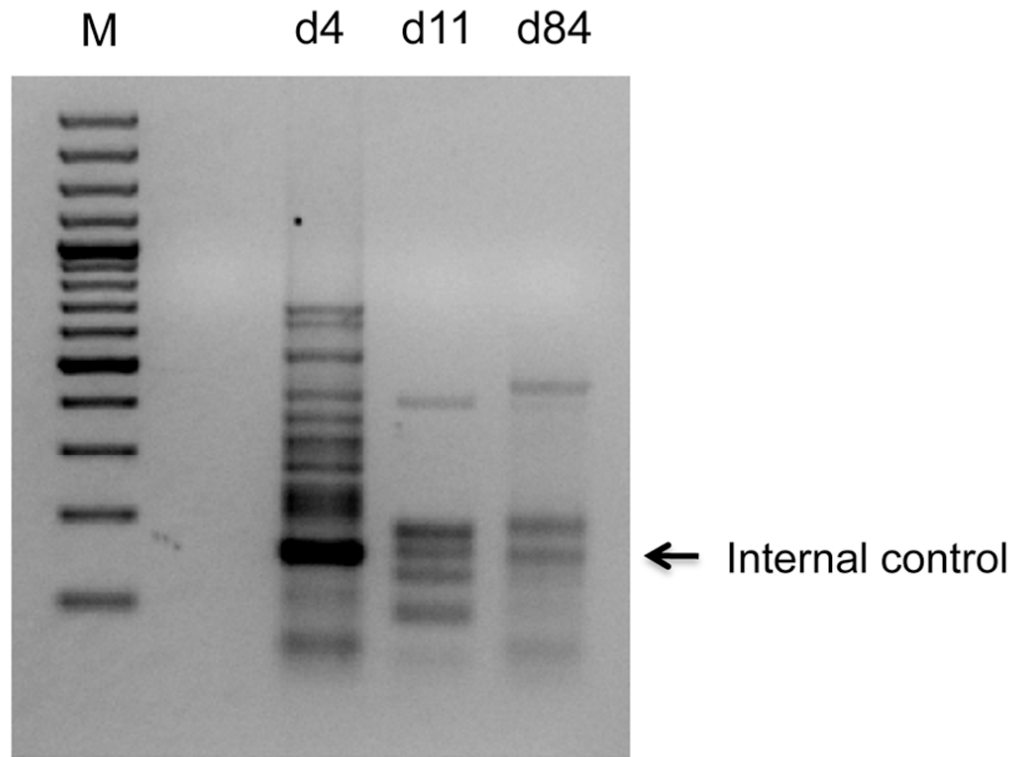

Newrzela et al, 2010: Figure S1

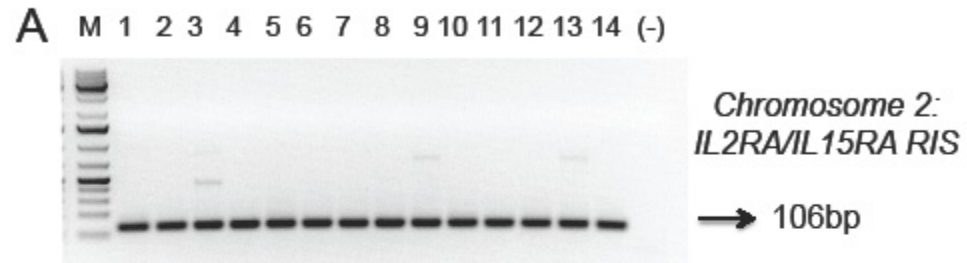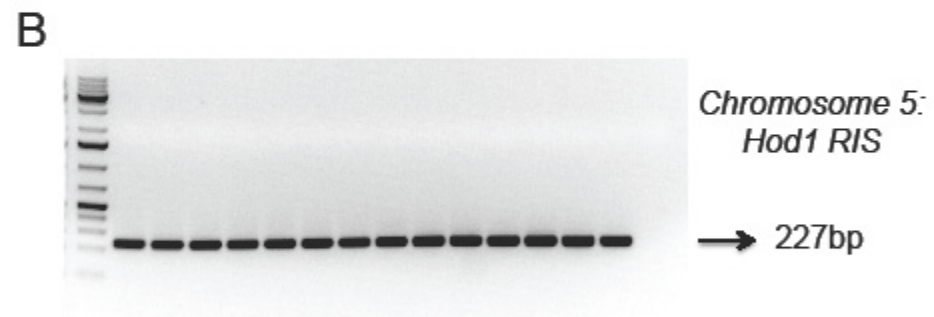

Newrzela et al, 2011: Figure S2

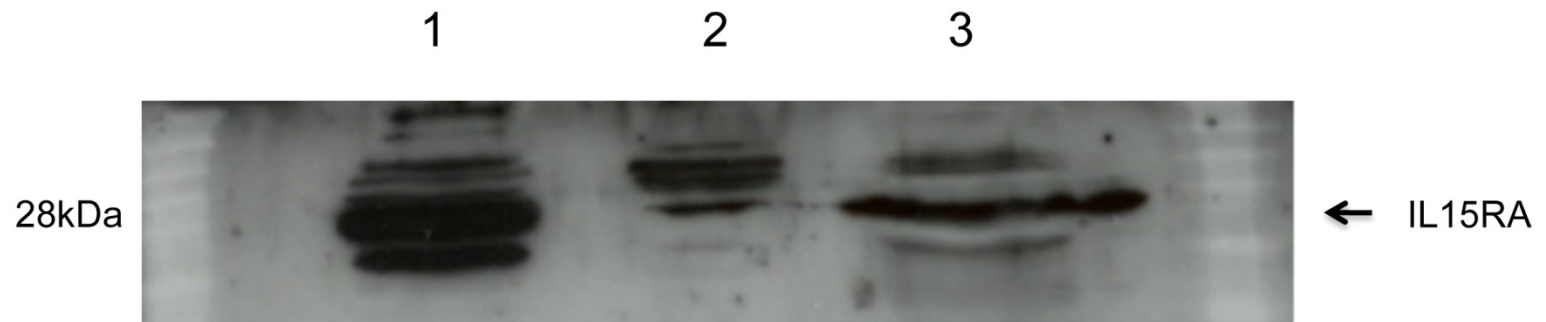

Newrzela et al, 2010: Figure S3
